# Supplementary material
Source: PubMed Central journal article supplement (PMC3975651)
Supplement: NIHMS545060-supplement-Supp_Table_S1-S4.pdf [file NIHMS545060-supplement-Supp_Table_S1-S4.pdf]

## **Supplementary material**

### ***Anolis* sex chromosomes are derived from a single ancestral pair**

TONY GAMBLE, ANTHONY J. GENEVA, RICHARD E. GLOR, DAVID ZARKOWER

**Supplementary Figure 1** – Majority rule phylogenetic tree inferred for 216 *Anolis* species using BEAST. Node support (posterior probability) for Beast and MrBayes analyses are indicated by color coded circles. Karyotype data were available for species indicated by black text.

**Supplementary Figure 2** – Ancestral state reconstruction of 1n female chromosome number onto the pruned phylogeny. Maximum likelihood estimate of ancestral chromosome number is indicated on each node. Female 1n chromosome number is indicated after each species name.

**Supplementary Table 1** – Samples used in the phylogenetic and comparative evolutionary analyses.

**Supplementary Table 2** – Samples used for qPCR.

**Supplementary Table 3** – Primers used for qPCR.

**Supplementary Table 4** – qPCR results showing mean fold change in quantification of genes in male samples compared to female samples with standard error and 95% confidence intervals.



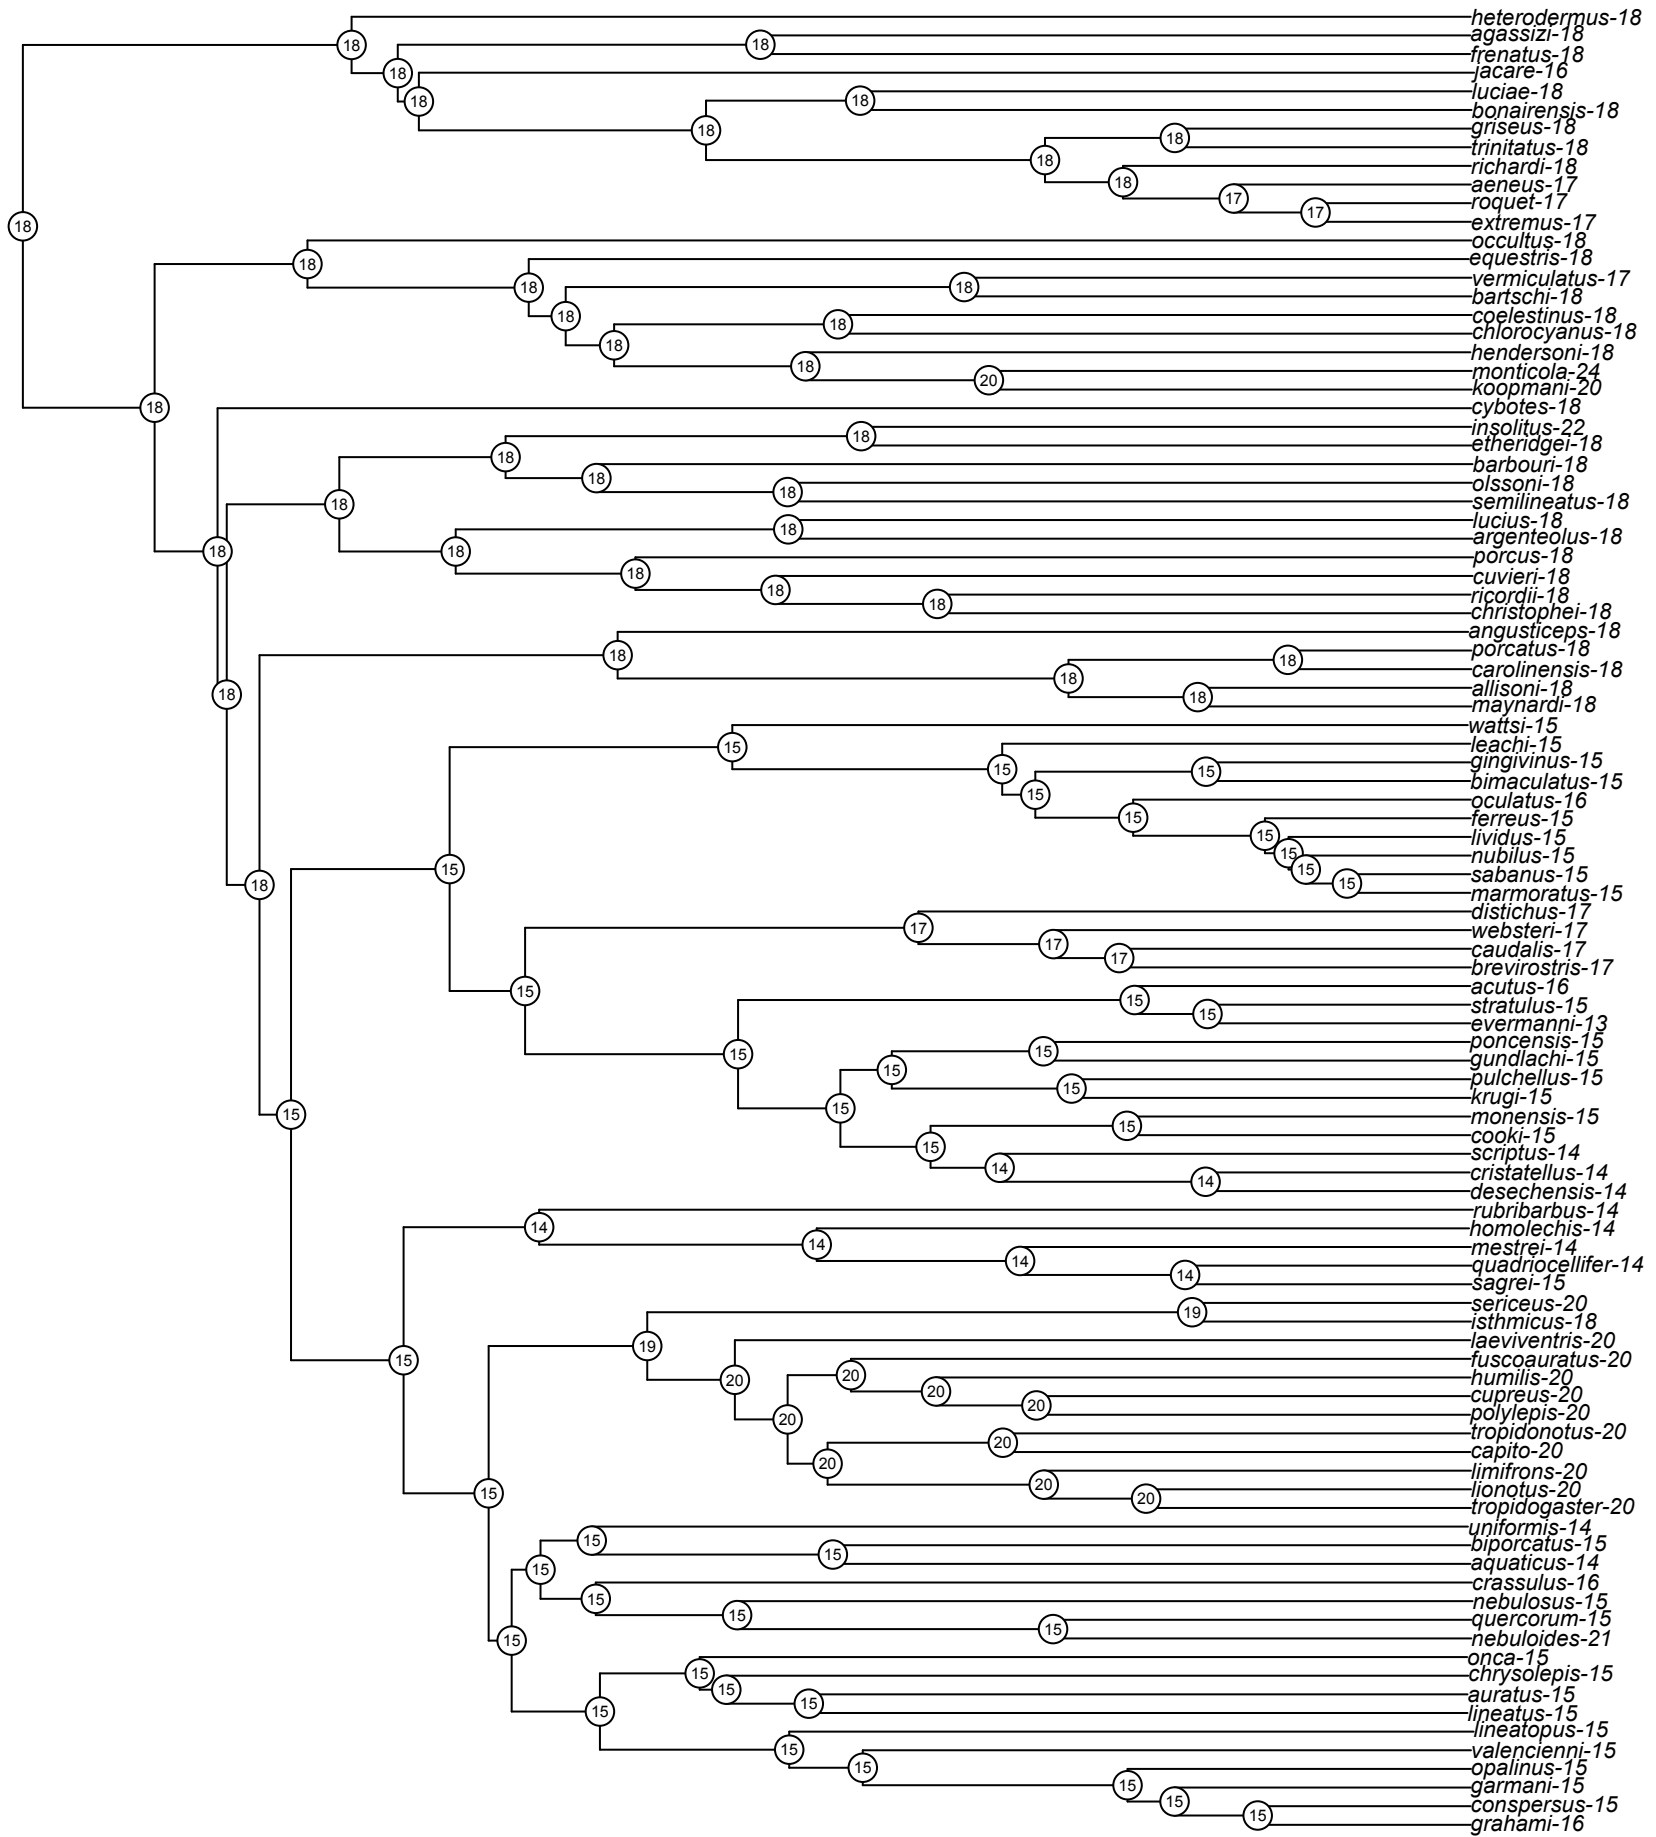

Supplementary table 1. Sources of data used in phylogenetic and comparative evolutionary analyses. Genbank accession number for ND2 sequences used in phylogenetic analyses. Cytogenetic data consists of chromosome number (1N) and the presence/absence of heteromorphic sex chromosomes as well as the source of that data (“no” means the species lacks heteromorphic sex chromosomes). *Anolis woodi*, labeled “n/a”, was not included in the comparative analyses because there were no data concerning the occurrence of heteromorphic sex chromosomes in the original citation.

| Species                           | ND2<br>GenBank | Female<br>1N | Sex<br>Chromosome<br>Complement | Source                    |
|-----------------------------------|----------------|--------------|---------------------------------|---------------------------|
| <i>Liocephalus carinatus</i>      | AF049864.1     |              |                                 |                           |
| <i>Polychrus acutirostris</i> (1) | AF055925.2     |              |                                 |                           |
| <i>Polychrus acutirostris</i> (2) | AF528737.1     |              |                                 |                           |
| <i>A. acutus</i>                  | AF055926.2     | 16           | XXY                             | (Gorman and Atkins 1969)  |
| <i>A. aeneus</i>                  | AF055949.2     | 17           | no                              | (Gorman and Atkins 1967)  |
| <i>A. aequatorialis</i>           | JN112663.1     |              |                                 |                           |
| <i>A. agassizi</i>                | AF055952       | 18           | no                              | (Stamm and Gorman 1975)   |
| <i>A. ahli</i>                    | KF819775       |              |                                 |                           |
| <i>A. alayoni</i>                 | AY296149       |              |                                 |                           |
| <i>A. alfaroi</i>                 | AY296150       |              |                                 |                           |
| <i>A. aliniger</i>                | EF531487.1     |              |                                 |                           |
| <i>A. allisoni</i>                | AY296151.1     | 18           | no                              | (Gorman et al. 1967)      |
| <i>A. allogus</i>                 | KF819776       |              |                                 |                           |
| <i>A. altae</i>                   | AY090735       |              |                                 |                           |
| <i>A. altitudinalis</i>           | AY654203       |              |                                 |                           |
| <i>A. alumina</i>                 | AY296153       |              |                                 |                           |
| <i>A. alutaceus</i>               | AF055971       |              |                                 |                           |
| <i>A. anatoloros</i>              | JN112668.1     |              |                                 |                           |
| <i>A. angusticeps</i>             | AF055967       | 18           | no                              | (Gorman and Atkins 1968b) |
| <i>A. annectens</i>               | AY909736       |              |                                 |                           |
| <i>A. anoriensis</i>              | JN112664.1     |              |                                 |                           |
| <i>A. aquaticus</i>               | AY909738       | 14           | no                              | (Lieb 1981)               |
| <i>A. argenteolus</i>             | AY296154       | 18           | no                              | (Gorman and Atkins 1968b) |
| <i>A. argillaceus</i>             | AY909739       |              |                                 |                           |
| <i>A. armouri</i>                 | AY263012.1     |              |                                 |                           |
| <i>A. auratus</i>                 | AY909740       | 15           | no                              | (Gorman et al. 1967)      |
| <i>A. bahorucoensis</i>           | AF055932       |              |                                 |                           |
| <i>A. baleatus</i>                | AY296155       |              |                                 |                           |
| <i>A. baracoae</i>                | AY296156       |              |                                 |                           |
| <i>A. barahonae</i>               | AF055972       |              |                                 |                           |
| <i>A. barbatus</i>                | AY296146       |              |                                 |                           |
| <i>A. barbouri</i>                | AF055946       | 18           | no                              | (Paull et al. 1976)       |
| <i>A. bartschi</i>                | AF055960       | 18           | no                              | (Gorman and Atkins 1968b) |
| <i>A. bicaorum</i>                | AY909741       |              |                                 |                           |
| <i>A. bimaculatus</i>             | KF819777       | 15           | XXY                             | (Gorman 1965)             |
| <i>A. biporcatus</i>              | KF819778       | 15           | XXY                             | (Gorman and Atkins 1966)  |

| Species                   | ND2<br>GenBank | Female<br>1N | Sex<br>Chromosome<br>Complement | Source                          |
|---------------------------|----------------|--------------|---------------------------------|---------------------------------|
| <i>A. bitectus</i>        | AY909743       |              |                                 |                                 |
| <i>A. bonairensis</i>     | AF317070.1     | 18           | no                              | (Gorman 1965)                   |
| <i>A. bremeri</i>         | AF296157.1     |              |                                 |                                 |
| <i>A. breslini</i>        | AY263017       |              |                                 |                                 |
| <i>A. brevirostris</i>    | AY296158       | 17           | XXY                             | (Williams 1977)                 |
| <i>A. brunneus</i>        | KF819779       |              |                                 |                                 |
| <i>A. calimae</i>         | JN112669.1     |              |                                 |                                 |
| <i>A. capito</i>          | AY909744       | 20           | no                              | (Gorman 1973)                   |
| <i>A. carolinensis</i>    | AF294279.1     | 18           | no                              | (Porter et al. 1994)            |
| <i>A. carpenteri</i>      | AY296160       |              |                                 |                                 |
| <i>A. casilda</i>         | AY909745       |              |                                 |                                 |
| <i>A. caudalis</i>        | AY296161       | 17           | XXY                             | (Williams 1977)                 |
| <i>A. centralis</i>       | AY296162       |              |                                 |                                 |
| <i>A. chamaeleonides</i>  | AF055975       |              |                                 |                                 |
| <i>A. chloris</i>         | JN112671.1     |              |                                 |                                 |
| <i>A. chlorocyanus</i>    | EF531535       | 18           | no                              | (Gorman et al. 1967)            |
| <i>A. chocorum</i>        | JN112674.1     |              |                                 |                                 |
| <i>A. christophei</i>     | AF055957       | 18           | no                              | (Webster et al. 1972)           |
| <i>A. chrysolepis</i>     | AF294281.1     | 15           | no                              | (Gorman 1965)                   |
| <i>A. clivicola</i>       | AY909746       |              |                                 |                                 |
| <i>A. coelestinus</i>     | AY296164.1     | 18           | no                              | (Gorman et al. 1967)            |
| <i>A. confusus</i>        | AY909787       |              |                                 |                                 |
| <i>A. conspersus</i>      | AF294304       | 15           | XY                              | (Gorman and Atkins 1966, 1968a) |
| <i>A. cooki</i>           | AY909747       | 15           | XXY                             | (Gorman et al. 1968)            |
| <i>A. crassulus</i>       | AY909748       | 16           | XY                              | (Lieb 1981)                     |
| <i>A. cristatellus</i>    | EF531400       | 14           | XXY                             | (Gorman et al. 1968)            |
| <i>A. cupeyalensis</i>    | AY909749       |              |                                 |                                 |
| <i>A. cupreus</i>         | AY909750       | 20           | no                              | (Gorman 1973)                   |
| <i>A. cuvieri</i>         | AF055973       | 18           | no                              | (Gorman and Atkins 1969)        |
| <i>A. cyanopleurus</i>    | AY909751       |              |                                 |                                 |
| <i>A. cybotes</i>         | AY263138.1     | 18           | no                              | (Gorman and Atkins 1966)        |
| <i>A. danieli</i>         | JN112677.1     |              |                                 |                                 |
| <i>A. darlingtoni</i>     | AY367137       |              |                                 |                                 |
| <i>A. desechensis</i>     | AY296167.1     | 14           | XXY                             | (Brandley et al. 2006)          |
| <i>A. distichus</i>       | AY296168       | 17           | XXY                             | (Gorman and Atkins 1969)        |
| <i>A. dolichocephalus</i> | AY296169.1     |              |                                 |                                 |
| <i>A. equestris</i>       | AF055978       | 18           | no                              | (Gorman 1965)                   |
| <i>A. ernestwilliamsi</i> | AY296170.1     |              |                                 |                                 |
| <i>A. etheridgei</i>      | AF055934       | 18           | no                              | (Webster et al. 1972)           |
| <i>A. eugenegrahami</i>   | AY296171       |              |                                 |                                 |
| <i>A. euskalerrari</i>    | JN112678.1     |              |                                 |                                 |
| <i>A. evermanni</i>       | AY296172.1     | 13           | XY                              | (Gorman and Atkins 1968a)       |
| <i>A. extremus</i>        | AF317065.1     | 17           | no                              | (Gorman and Atkins 1967)        |
| <i>A. ferreus</i>         | AY296173.1     | 15           | XXY                             | (Gorman and Atkins 1969)        |



| Species                    | ND2<br>GenBank | Female<br>1N | Sex<br>Chromosome<br>Complement | Source                    |
|----------------------------|----------------|--------------|---------------------------------|---------------------------|
| <i>A. lucius</i>           | AF055962.2     | 18           | no                              | (Gorman and Atkins 1968b) |
| <i>A. luteogularis</i>     | AF055977.2     |              |                                 |                           |
| <i>A. macilentus</i>       | AY296185.1     |              |                                 |                           |
| <i>A. maculigula</i>       | JN112699.1     |              |                                 |                           |
| <i>A. marcanoi</i>         | AY263006.1     |              |                                 |                           |
| <i>A. marmoratus</i>       | AY296186.1     | 15           | XXY                             | (Gorman and Atkins 1966)  |
| <i>A. marron</i>           | AY296187       |              |                                 |                           |
| <i>A. maynardi</i>         | AY902409       | 18           | no                              | (Gorman and Atkins 1968b) |
| <i>A. meridionalis</i>     | AY909760       |              |                                 |                           |
| <i>A. mestrei</i>          | AF337779.1     | 14           | no                              | (Gorman and Atkins 1968b) |
| <i>A. microtus</i>         | AF055947.2     |              |                                 |                           |
| <i>A. monensis</i>         | AY296188.1     | 15           | XXY                             | (Gorman and Stamm 1975)   |
| <i>A. monticola</i>        | AY296189.1     | 24           | no                              | (Webster et al. 1972)     |
| <i>A. neblininus</i>       | JN112700.1     |              |                                 |                           |
| <i>A. nebuloides</i>       | AY909763       | 21           | XY                              | (Lieb 1981)               |
| <i>A. nebulosus</i>        | HM236483.1     | 15           | XY                              | (Gorman 1973)             |
| <i>A. nicefori</i>         | AF337768       |              |                                 |                           |
| <i>A. noblei</i>           | AY296190.1     |              |                                 |                           |
| <i>A. nubilus</i>          | AY909764       | 15           | XXY                             | (Gorman and Stamm 1975)   |
| <i>A. occultus</i>         | AF055976.2     | 18           | no                              | (Gorman and Atkins 1969)  |
| <i>A. oculatus</i>         | AY296191.1     | 16           | XXY                             | (Gorman and Atkins 1967)  |
| <i>A. olssoni</i>          | AF055945.2     | 18           | no                              | (Gorman et al. 1967)      |
| <i>A. onca</i>             | AY909765       | 15           | XY                              | (Gorman 1969)             |
| <i>A. opalinus</i>         | AF294309.1     | 15           | XY                              | (Gorman 1969)             |
| <i>A. ophiolepis</i>       | AF055942       |              |                                 |                           |
| <i>A. oporinus</i>         | AY909766       |              |                                 |                           |
| <i>A. ortonii</i>          | AF337799.1     |              |                                 |                           |
| <i>A. ocelloscapularis</i> | AY909767       |              |                                 |                           |
| <i>A. oxylophus</i>        | AY909768       |              |                                 |                           |
| <i>A. pachypus</i>         | AY909769       |              |                                 |                           |
| <i>A. pandoensis</i>       | AY909770       |              |                                 |                           |
| <i>A. paternus</i>         | U82679.1       |              |                                 |                           |
| <i>A. peraccae</i>         | JN112701.1     |              |                                 |                           |
| <i>A. placidus</i>         | AY296192.1     |              |                                 |                           |
| <i>A. planiceps</i>        | AF337805       |              |                                 |                           |
| <i>A. podocarpus</i>       | JN112703.1     |              |                                 |                           |
| <i>A. poecilopus</i>       | AY909771       |              |                                 |                           |
| <i>A. pogus</i>            | AY296193.1     |              |                                 |                           |
| <i>A. polylepis</i>        | AY909772       | 20           | no                              | (Gorman 1973)             |
| <i>A. polyrhachis</i>      | AY909773       |              |                                 |                           |
| <i>A. poncensis</i>        | AY296194.1     | 15           | XXY                             | (Gorman and Atkins 1969)  |
| <i>A. porcatus</i>         | AY296195       | 18           | no                              | (Gorman and Atkins 1968b) |
| <i>A. porcus</i>           | AY296147       | 18           | no                              | (Gorman et al. 1969)      |
| <i>A. princeps</i>         | JN112704.1     |              |                                 |                           |
| <i>A. pulchellus</i>       | AY296196.1     | 15           | XXY                             | (Gorman et al. 1968)      |
| <i>A. pumilis</i>          | AF055963.2     |              |                                 |                           |

| Species                   | ND2<br>GenBank | Female<br>1N | Sex<br>Chromosome<br>Complement | Source                    |
|---------------------------|----------------|--------------|---------------------------------|---------------------------|
| <i>A. punctatus</i>       | AF337777.1     |              |                                 |                           |
| <i>A. purpurgularis</i>   | AY909774       |              |                                 |                           |
| <i>A. quadriocellifer</i> | AY655169       | 14           | no                              | (Gorman and Atkins 1968b) |
| <i>A. quercorum</i>       | AY909775       | 15           | XY                              | (Lieb 1981)               |
| <i>A. reconditus</i>      | AY296198.1     |              |                                 |                           |
| <i>A. rejectus</i>        | AY909761       |              |                                 |                           |
| <i>A. richardi</i>        | AF055949.2     | 18           | no                              | (Gorman and Atkins 1967)  |
| <i>A. ricordii</i>        | AF055949.2     | 18           | no                              | (Gorman et al. 1967)      |
| <i>A. roquet</i>          | AY296199.1     | 17           | no                              | (Gorman and Atkins 1967)  |
| <i>A. rubribarbus</i>     | AY909789       | 14           | no                              | (Gorman and Atkins 1968b) |
| <i>A. sabanus</i>         | AY909776       | 15           | XXY                             | (Gorman and Atkins 1969)  |
| <i>A. sagrei</i>          | AF337778.1     | 15           | XXY                             | (De Smet 1981)            |
| <i>A. schwartzi</i>       | AY909777       |              |                                 |                           |
| <i>A. scriptus</i>        | AY296200.1     | 14           | XXY                             | (Gorman et al. 1968)      |
| <i>A. semilineatus</i>    | AY296201.1     | 18           | no                              | (Gorman et al. 1967)      |
| <i>A. sericeus</i>        | AY909778       | 20           | no                              | (Lieb 1981)               |
| <i>A. sheplani</i>        | AF055966.2     |              |                                 |                           |
| <i>A. shrevei</i>         | AY263037.1     |              |                                 |                           |
| <i>A. singularis</i>      | EF531478.1     |              |                                 |                           |
| <i>A. smallwoodi</i>      | AY296203.1     |              |                                 |                           |
| <i>A. smaragdinus</i>     | AY902424       |              |                                 |                           |
| <i>A. sminthus</i>        | AY909779       |              |                                 |                           |
| <i>A. sp nov 1</i>        | AY909737       |              |                                 |                           |
| <i>A. sp nov 2</i>        | AY909742       |              |                                 |                           |
| <i>A. sp nov. 3</i>       | KF819784       |              |                                 |                           |
| <i>A. strahmi</i>         | AY263007.1     |              |                                 |                           |
| <i>A. stratulus</i>       | AF055929.2     | 15           | XXY                             | (Gorman and Atkins 1969)  |
| <i>A. tigrinus</i>        | JN112710.1     |              |                                 |                           |
| <i>A. trachyderma</i>     | AF337785.1     |              |                                 |                           |
| <i>A. tranquillus</i>     | AY909780       |              |                                 |                           |
| <i>A. transversalis</i>   | AF337769.1     |              |                                 |                           |
| <i>A. trinitatus</i>      | AY909781       | 18           | no                              | (Gorman and Atkins 1967)  |
| <i>A. tropidogaster</i>   | AY909782       | 20           | no                              | (Gorman 1973)             |
| <i>A. tropidonotus</i>    | AY909783       | 20           | no                              | (Gorman 1973)             |
| <i>A. uniformis</i>       | AY909784       | 14           | no                              | (Lieb 1981)               |
| <i>A. utilis</i>          | AY909785       |              |                                 |                           |
| <i>A. valencienni</i>     | AF055939.2     | 15           | no                              | (Gorman and Atkins 1968b) |
| <i>A. vanidicus</i>       | AF055970.2     |              |                                 |                           |
| <i>A. vanzolinii</i>      | JN112712.1     |              |                                 |                           |
| <i>A. ventrimaculatus</i> | JN112713.1     |              |                                 |                           |
| <i>A. vermiculatus</i>    | AF055961.1     | 17           | no                              | (Gorman and Atkins 1968b) |
| <i>A. wattsi</i>          | AF055931       | 15           | XXY                             | (Gorman and Atkins 1969)  |
| <i>A. websteri</i>        | AY296205.1     | 17           | XXY                             | (Williams 1977)           |
| <i>A. whitemani</i>       | AY263023.1     |              |                                 |                           |
| <i>A. woodi</i>           | AF337780.1     | 15           | n/a                             | (Lieb 1981)               |
| <i>A. zeus</i>            | AY909786       |              |                                 |                           |



## Literature Cited

- Blake, J. A. 1986. Complex chromosomal variation in natural populations of the Jamaican lizard *Anolis grahami*. *Genetica* 69:3–17.
- Brandley, M. C., A. Wynn, and K. de Queiroz. 2006. Karyotype and relationships of *Anolis desechensis*. *J Herpetol* 40:136–139.
- De Smet, W. H. O. 1981. Description of the orcin stained karyotypes of 27 lizard species (Lacertilia: Reptilia) belonging to the families Iguanidae, Agamidae Chameleontidae and Gekkonidae (Ascalabota). *Acta Zool Pathol Antverp* 76:35–72.
- Gorman, G. C. 1965. Interspecific karyotypic variation as a systematic character in the genus *Anolis* (Sauria: Iguanidae). *Nature* 208:95–97.
- Gorman, G. C. 1969. Chromosomes of three species of anoline lizards in the genera *Anolis* and *Tropidodactylus*. *Mammalian Chromosome Newsletter* 10:222–225.
- Gorman, G. C. 1973. The chromosomes of the Reptilia: A cytotaxonomic interpretation. Pp. 349–424 in B. Chiarelli, and E. Capanna, eds. *Cytotaxonomy and Vertebrate Evolution*. Academic Press, London.
- Gorman, G. C., and L. Atkins. 1966. Chromosomal heteromorphism in some male lizards of the genus *Anolis*. *Am Nat* 100:579–583.
- Gorman, G. C., and L. Atkins. 1967. The relationships of the *Anolis* of the *roquet* species group (Sauria: Iguanidae). II. Comparative chromosome cytology. *Syst Zool* 16:137–143.
- Gorman, G. C., and L. Atkins. 1968a. Confirmation of an X-Y sex determining mechanism in lizards (*Anolis*). *Copeia* 1968:159–160.
- Gorman, G. C., and L. Atkins. 1968b. New karyotypic data for 16 species of *Anolis* (Sauria: Iguanidae) from Cuba, Jamaica, and the Cayman Islands. *Herpetologica* 24:13–21.
- Gorman, G. C., and L. Atkins. 1969. The zoogeography of Lesser Antillean *Anolis* lizards - An analysis based upon chromosomes and lactic dehydrogenases. *Bull Mus Comp Zool* 138:53–80.
- Gorman, G. C., L. Atkins, and T. Holzinger. 1967. New karyotypic data on 15 genera of lizards in the family Iguanidae, with a discussion of taxonomic and cytological implications. *Cytogenetics* 6:286–299.
- Gorman, G. C., R. B. Huey, and E. E. Williams. 1969. Cytotaxonomic studies on some unusual iguanid lizards assigned to the genera *Chamaeleois*, *Polychrus*, *Polychroides* and *Phenacosaurus*, with behavioral notes. *Breviora*:1–17.
- Gorman, G. C., and B. Stamm. 1975. The *Anolis* lizards of Mona, Redonda, and La Blanquilla: Chromosomes, relationships, and natural history notes. *J Herpetol* 9:197–205.
- Gorman, G. C., R. Thomas, and L. Atkins. 1968. Intra- and interspecific chromosome variation in the lizard *Anolis cristatellus* and its closest relatives. *Breviora*:1–13.
- Lieb, C. S. 1981. Biochemical and Karyological Systematics of the Mexican lizards of the *Anolis gadovi* and *A. nebulosus* species group (Reptilia: Iguanidae). Pp. 331. University California, Los Angeles, Los Angeles, CA.
- Paull, D., E. E. Williams, and W. P. Hall. 1976. Lizard karyotypes from the Galapagos Islands: Chromosomes in phylogeny and evolution. *Breviora*:1–31.

- Porter, C. A., M. W. Haiduk, and K. de Queiroz. 1994. Evolution and phylogenetic significance of ribosomal gene location in chromosomes of squamate reptiles. *Copeia* 1994:302–313.
- Stamm, B., and G. C. Gorman. 1975. Notes on the chromosomes of *Anolis agassizi* (Sauria: Iguanidae) and *Diploglossus millepunctatus* (Sauria: Anguidae). Pp. 52–54 in J. B. Graham, ed. *The Biological Investigation of Malpelo Island, Colombia*. Smithsonian Contributions to Zoology (176), Washington, DC.
- Webster, T. P., E. E. Williams, and W. P. Hall. 1972. Fission in the evolution of a lizard karyotype. *Science* 177:611–613.
- Williams, E. E. 1977. Pp. 104–151 in E. E. Williams, ed. *The Third Anolis Newsletter*. Museum of Comparative Zoology, Cambridge, MA.
- Williams, E. E., O. A. Reig, P. Kiblicky, and C. Rivero-Blanco. 1970. *Anolis jacare* Boulenger, a "solitary" anole from the Andes of Venezuela. *Breviora*:1–15.

Supplementary Table 2. *Anolis* samples used in qPCR experiments.

| Species                        | ID       | Sex    | Locality                                                         |
|--------------------------------|----------|--------|------------------------------------------------------------------|
| <i>A. aeneus</i>               | TG1660   | Female | Cambleton, Tobago, Trinidad & Tobago                             |
| <i>A. aeneus</i>               | TG1687   | Female | Arima, Trinidad, Trinidad & Tobago                               |
| <i>A. aeneus</i>               | TG1831   | Female | Arima, Trinidad, Trinidad & Tobago                               |
| <i>A. aeneus</i>               | TG1832   | Female | Arima, Trinidad, Trinidad & Tobago                               |
| <i>A. aeneus</i>               | TG1726   | Male   | St. Joseph, Trinidad, Trinidad & Tobago                          |
| <i>A. aeneus</i>               | TG1830   | Male   | Arima, Trinidad, Trinidad & Tobago                               |
| <i>A. carolinensis</i>         | TG1437   | Female | unknown                                                          |
| <i>A. carolinensis</i>         | TG1607   | Female | Kailua-Kona, Hawai'i County, Hawaii, USA                         |
| <i>A. carolinensis</i>         | TG1608   | Female | Kailua-Kona, Hawai'i County, Hawaii, USA                         |
| <i>A. carolinensis</i>         | TG1436   | Male   | unknown                                                          |
| <i>A. carolinensis</i>         | TG1578   | Male   | Kailua-Kona, Hawai'i County, Hawaii, USA                         |
| <i>A. carolinensis</i>         | TG1609   | Male   | Kailua-Kona, Hawai'i County, Hawaii, USA                         |
| <i>A. chlorocyanus</i>         | Glor5555 | Female | Loc 486, Barrera, Dominican Republic                             |
| <i>A. chlorocyanus</i>         | Glor5605 | Female | Loc 488, west of Puerto Viejo, Dominican Republic                |
| <i>A. chlorocyanus</i>         | Glor5869 | Female | Loc 528, northwest of San Juan de la Maguana, Dominican Republic |
| <i>A. chlorocyanus</i>         | Glor6310 | Male   | Loc 567, east of Hato Mayor del Rey, Dominican Republic          |
| <i>A. chlorocyanus</i>         | Glor6583 | Male   | Loc 580, Cape Cana, Dominican Republic                           |
| <i>A. chlorocyanus</i>         | Glor7299 | Male   | Loc 634, north of Bani, Dominican Republic                       |
| <i>A. distichus ravitergum</i> | Glor5522 | Female | Loc 402, north of Bani, Dominican Republic                       |
| <i>A. distichus ravitergum</i> | Glor5537 | Female | Loc 402, north of Bani, Dominican Republic                       |
| <i>A. distichus ravitergum</i> | Glor5542 | Female | Loc 402, north of Bani, Dominican Republic                       |
| <i>A. distichus ravitergum</i> | Glor4245 | Male   | Loc 396, east of Bani, Dominican Republic                        |
| <i>A. distichus ravitergum</i> | Glor4246 | Male   | Loc 396, east of Bani, Dominican Republic                        |
| <i>A. distichus ravitergum</i> | Glor5527 | Male   | Loc 402, north of Bani, Dominican Republic                       |
| <i>A. grahami</i>              | TG1490   | Female | near Mahoe Bay, Saint Mary Parish, Jamaica                       |

| Species              | ID       | Sex    | Locality                                       |
|----------------------|----------|--------|------------------------------------------------|
| <i>A. grahami</i>    | TG1492   | Female | near Mahoe Bay, Saint Mary Parish, Jamaica     |
| <i>A. grahami</i>    | TG1493   | Male   | near Mahoe Bay, Saint Mary Parish, Jamaica     |
| <i>A. grahami</i>    | TG1494   | Male   | near Mahoe Bay, Saint Mary Parish, Jamaica     |
| <i>A. lineatopus</i> | TG1485   | Female | near Mahoe Bay, Saint Mary Parish, Jamaica     |
| <i>A. lineatopus</i> | TG1486   | Female | near Mahoe Bay, Saint Mary Parish, Jamaica     |
| <i>A. lineatopus</i> | TG1487   | Female | near Mahoe Bay, Saint Mary Parish, Jamaica     |
| <i>A. lineatopus</i> | TG1488   | Male   | near Mahoe Bay, Saint Mary Parish, Jamaica     |
| <i>A. lineatopus</i> | TG1489   | Male   | near Mahoe Bay, Saint Mary Parish, Jamaica     |
| <i>A. lineatus</i>   | MCZ25767 | Female | Downtown Oranjestad, Aruba                     |
| <i>A. lineatus</i>   | MCZ25772 | Female | Downtown Oranjestad, Aruba                     |
| <i>A. lineatus</i>   | MCZ29307 | Female | Downtown Oranjestad, Aruba                     |
| <i>A. lineatus</i>   | C15      | Male   | Lodge Kura Hulanda, near Westpunt, Curaçao     |
| <i>A. lineatus</i>   | MCZ25719 | Male   | Downtown Oranjestad, Aruba                     |
| <i>A. lineatus</i>   | MCZ29306 | Male   | Downtown Oranjestad, Aruba                     |
| <i>A. richardii</i>  | TG1646   | Female | near Charlotteville, Tobago, Trinidad & Tobago |
| <i>A. richardii</i>  | TG1866   | Female | near Charlotteville, Tobago, Trinidad & Tobago |
| <i>A. richardii</i>  | TG1868   | Female | near Charlotteville, Tobago, Trinidad & Tobago |
| <i>A. richardii</i>  | TG1644   | Male   | near Charlotteville, Tobago, Trinidad & Tobago |
| <i>A. richardii</i>  | TG1647   | Male   | near Charlotteville, Tobago, Trinidad & Tobago |
| <i>A. richardii</i>  | TG1865   | Male   | near Charlotteville, Tobago, Trinidad & Tobago |
| <i>A. sagrei</i>     | TG1461   | Female | Tarpon Springs, Pinellas County, Florida, USA  |
| <i>A. sagrei</i>     | TG1462   | Female | Tarpon Springs, Pinellas County, Florida, USA  |
| <i>A. sagrei</i>     | TG1463   | Female | Gainesville, Alachua County, Florida, USA      |
| <i>A. sagrei</i>     | TG1454   | Male   | Lake Placid, Highlands County, Florida, USA    |
| <i>A. sagrei</i>     | TG1459   | Male   | Tarpon Springs, Pinellas County, Florida, USA  |
| <i>A. sagrei</i>     | TG1464   | Male   | Gainesville, Alachua County, Florida, USA      |

Supplementary Table 3. Primers used for qPCR. KANK1 primers AcF2 and AcR2 were used only with *A. aeneus* and *A. richardii* samples.

| <b>Primer name</b> | <b>Primer sequence (5' to 3')</b> | <b>Chromosome</b> |
|--------------------|-----------------------------------|-------------------|
| <b>NGFB</b>        |                                   | Chr 4             |
| AnolisF1           | ATCTGAAGATAATGCGCCTTTG            |                   |
| AnolisR1           | CCACCATCACAGTCACCTCTT             |                   |
| <b>KANK1</b>       |                                   | Chr 2             |
| AcF                | CCTTCCTTTGTAGGATCCAGTG            |                   |
| AcR                | GGAGCACAGGGATAGTTTTGAC            |                   |
| AcF2               | TCTTCTTTGGGTAGTTCCATCC            |                   |
| AcR2               | TACCTGGAGCACAGGGATAGTT            |                   |
| <b>CLTCL1</b>      |                                   | Chr X             |
| epic-F             | CAGACGTATTGCTGCTTACCTG            |                   |
| epic-R             | GCGAAACACTCCTTCTTGTCTT            |                   |
| <b>PI4KA</b>       |                                   | Chr X             |
| epicA-F            | GAAGGAAATCCACGATTTTGTC            |                   |
| epicA-R            | ATGATGACTTTGCTGGAGGTCT            |                   |

Supplementary Table 4. qPCR results showing fold difference in gene quantity in male *Anolis* compared to females for one autosomal gene and two genes that are X-linked in *Anolis carolinensis*. The autosomal gene *ngfb* (Chr 4) was used as a reference for all loci. Standard error and 95% confidence intervals were calculated using 5,000 bootstrap replicates. Sample size and specimen data are listed in Supplementary Table 2. Primers for each locus are listed in Supplementary Table 3.

| Species                | Gene          | Chromosome | Fold difference | Std. Error    | 95% C. I.     |
|------------------------|---------------|------------|-----------------|---------------|---------------|
| <i>A. aeneus</i>       | <i>kank1</i>  | Chr 2      | 1.385           | 1.007 - 2.172 | 0.654 - 2.463 |
|                        | <i>cltcl1</i> | Chr X      | 0.538           | 0.387 - 0.799 | 0.338 - 1.051 |
|                        | <i>pi4ka</i>  | Chr X      | 0.575           | 0.450 - 0.751 | 0.423 - 0.944 |
| <i>A. carolinensis</i> | <i>kank1</i>  | Chr 2      | 1.103           | 0.967 - 1.318 | 0.895 - 1.395 |
|                        | <i>cltcl1</i> | Chr X      | 0.464           | 0.430 - 0.519 | 0.419 - 0.534 |
|                        | <i>pi4ka</i>  | Chr X      | 0.539           | 0.433 - 0.714 | 0.396 - 0.811 |
| <i>A. chlorocyanus</i> | <i>kank1</i>  | Chr 2      | 0.983           | 0.902 - 1.058 | 0.864 - 1.086 |
|                        | <i>cltcl1</i> | Chr X      | 0.913           | 0.634 - 1.239 | 0.532 - 1.596 |
|                        | <i>pi4ka</i>  | Chr X      | 0.606           | 0.468 - 0.745 | 0.450 - 0.795 |
| <i>A. distichus</i>    | <i>kank1</i>  | Chr 2      | 1.033           | 0.813 - 1.291 | 0.719 - 1.399 |
|                        | <i>cltcl1</i> | Chr X      | 0.465           | 0.343 - 0.603 | 0.329 - 0.638 |
|                        | <i>pi4ka</i>  | Chr X      | 0.639           | 0.433 - 0.924 | 0.355 - 1.287 |
| <i>A. grahami</i>      | <i>kank1</i>  | Chr 2      | 1.144           | 1.066 - 1.228 | 1.058 - 1.238 |
|                        | <i>cltcl1</i> | Chr X      | 0.505           | 0.482 - 0.530 | 0.468 - 0.545 |
|                        | <i>pi4ka</i>  | Chr X      | 0.441           | 0.417 - 0.466 | 0.414 - 0.469 |
| <i>A. lineatopus</i>   | <i>kank1</i>  | Chr 2      | 0.932           | 0.865 - 0.986 | 0.862 - 1.017 |
|                        | <i>cltcl1</i> | Chr X      | 0.515           | 0.481 - 0.543 | 0.473 - 0.552 |
|                        | <i>pi4ka</i>  | Chr X      | 0.392           | 0.334 - 0.479 | 0.329 - 0.486 |
| <i>A. lineatus</i>     | <i>kank1</i>  | Chr 2      | 1.117           | 1.035 - 1.185 | 1.009 - 1.272 |
|                        | <i>cltcl1</i> | Chr X      | 0.477           | 0.432 - 0.522 | 0.411 - 0.541 |
|                        | <i>pi4ka</i>  | Chr X      | 0.437           | 0.403 - 0.464 | 0.390 - 0.493 |
